# Supplementary material for: Three-Dimensional Assessment of Temporomandibular Joint Morphology and Facial Asymmetry in Individuals with Different Vertical Skeletal Growth Patterns
Source: MDPI journal article supplement (doi:10.3390/ijerph20021437), 2023-01-12
Supplement: s1 [file s1]

Table S1. Description of the linear and angular measurements of condyle morphology and position.

| Measurement                                 | Description                                                                                                                                                                  |
|---------------------------------------------|------------------------------------------------------------------------------------------------------------------------------------------------------------------------------|
| Anterior joint space (mm)<br>[AS]           | The shortest distance between the posterior wall of the articular tubercle and the most anterior point of the condylar head                                                  |
| Superior joint space (mm)<br>[SS]           | The distance between the most superior point of the mandibular fossa and the most superior point of the condylar head                                                        |
| Posterior joint space (mm)<br>[PS]          | The shortest distance between the posterior wall of the mandibular fossa and the most posterior point of the condylar head                                                   |
| Condylar length (mm)                        | Distance between the most anterior point of the condyle and the most posterior point of the condyle on sagittal plane                                                        |
| Condylar neck width (mm)                    | Distance between the most anterior point and the most posterior point of the condylar neck on the sagittal plane                                                             |
| Depth of the glenoid fossa (mm)             | The distance between the most superior point of the mandibular fossa and the plane formed by the most inferior points of the articular tubercle and the post glenoid process |
| Antero-posterior [AP] condyle diameter (mm) | Distance between the most anterior point of the condyle and the most posterior point of the condyle on axial plane                                                           |
| Medio-lateral [ML] condyle diameter (mm)    | Distance between the most lateral point of the condyle and the most medial point of the condyle on axial plane                                                               |
| Condylar axis angle (°)                     | Angle between the medio-lateral plane of the condylar process and the MSP                                                                                                    |
| Medial Joint space (mm)<br>[MS]             | The distance between the most medial point of the mandibular fossa and the most medial point of the condylar head                                                            |
| Lateral Joint space (mm)<br>[LS]            | The distance between the most lateral point of the mandibular fossa and the most lateral point of the condylar head                                                          |
| Medio-lateral [ML] condyle thickness        | Distance between the most lateral point of the condyle and the most medial point of the condyle on coronal plane                                                             |

Table S2. Description of landmarks for the assessment of asymmetry.

| Landmark                                           | Abbreviation | Description                                                                                    |
|----------------------------------------------------|--------------|------------------------------------------------------------------------------------------------|
| zygomaticofrontal sutures right (ZR) and left (ZL) | ZR / ZL      | The centre of the cranial suture between the zygomatic bone and the frontal bone               |
| zygomatic arch right (AZ) and left (ZA)            | AZ / ZA      | The centre of the roof of the zygomatic arch                                                   |
| jugal processes right (J) and left (J1)            | J / J1       | The point at the intersection of outline of maxillary tuberosity and zygomatic buttress        |
| antegonial right (AG) and left (GA)                | AG / GA      | Left and Right point of deepest concavity between anterior convexity point and inferior gonion |
| nasal concha right (C) and left (C1)               | C/C1         | Left and Right attachment of the inferior turbinate                                            |
| crista galli                                       | Cg           | Upper part of the perpendicular plate of the ethmoid bone of the skull.                        |
| menton                                             | Me           | The lowest point of the mandibular symphysis                                                   |
| anterior nasal spine                               | ANS          | Tip of the median sharp bony process of the palatine bone in the hard palate                   |
